# Supplementary material
Source: MDPI journal article supplement (https://www.mdpi.com/2071-1050/15/7/6274)

## Supplementary materials

# Urban scale monitoring approach for the assessment of rising damp effects in Venice

Laura Falchi <sup>1</sup>, Martina Corradini <sup>1</sup>, Eleonora Balliana<sup>1</sup> and Elisabetta Zendri <sup>1,\*</sup>

Table S1 Frequency table of variation of rising damp height; erosion extension; algal band; 0= no significant variation; 1=slight variation; 2=significant variation; /= non assessable

| Mark                                                 | Count | Cumulative - Count | Percent - of Valid | Cumul % - of Valid | % of all - Cases | Cumulative % - of All |
|------------------------------------------------------|-------|--------------------|--------------------|--------------------|------------------|-----------------------|
| Variation of rising front height K-S d=.36762. p<.01 |       |                    |                    |                    |                  |                       |
| -1                                                   | 3     | 3                  | 1.67598            | 1.6760             | 1.67598          | 1.6760                |
| 0                                                    | 107   | 110                | 59.77654           | 61.4525            | 59.77654         | 61.4525               |
| 1                                                    | 62    | 172                | 34.63687           | 96.0894            | 34.63687         | 96.0894               |
| 2                                                    | 7     | 179                | 3.91061            | 100.0000           | 3.91061          | 100.0000              |
| /                                                    | 0     | 179                | 0                  |                    | 0                | 100                   |
| Variation of erosion extension K-S d=.39419. p<.01   |       |                    |                    |                    |                  |                       |
| 0                                                    | 79    | 79                 | 62.20472           | 62.2047            | 44.13408         | 44.1341               |
| 1                                                    | 45    | 124                | 35.43307           | 97.6378            | 25.13966         | 69.2737               |
| 2                                                    | 3     | 127                | 2.36220            | 100.0000           | 1.67598          | 70.9497               |
| /                                                    | 52    | 179                | 40.94488           |                    | 29.05028         | 100.0000              |
| Variation of Algal band K-S d=.36022. p<.01          |       |                    |                    |                    |                  |                       |
| -1                                                   | 2     | 2                  | 3.9216             | 3.9216             | 1.11732          | 1.1173                |
| 0                                                    | 31    | 33                 | 60.7843            | 64.7059            | 17.31844         | 18.4358               |
| 1                                                    | 15    | 48                 | 29.4118            | 94.1176            | 8.37989          | 26.8156               |
| 2                                                    | 3     | 51                 | 5.8824             | 100.0000           | 1.67598          | 28.4916               |
| /                                                    | 128   | 179                | 250.9804           |                    | 71.50838         | 100.0000              |

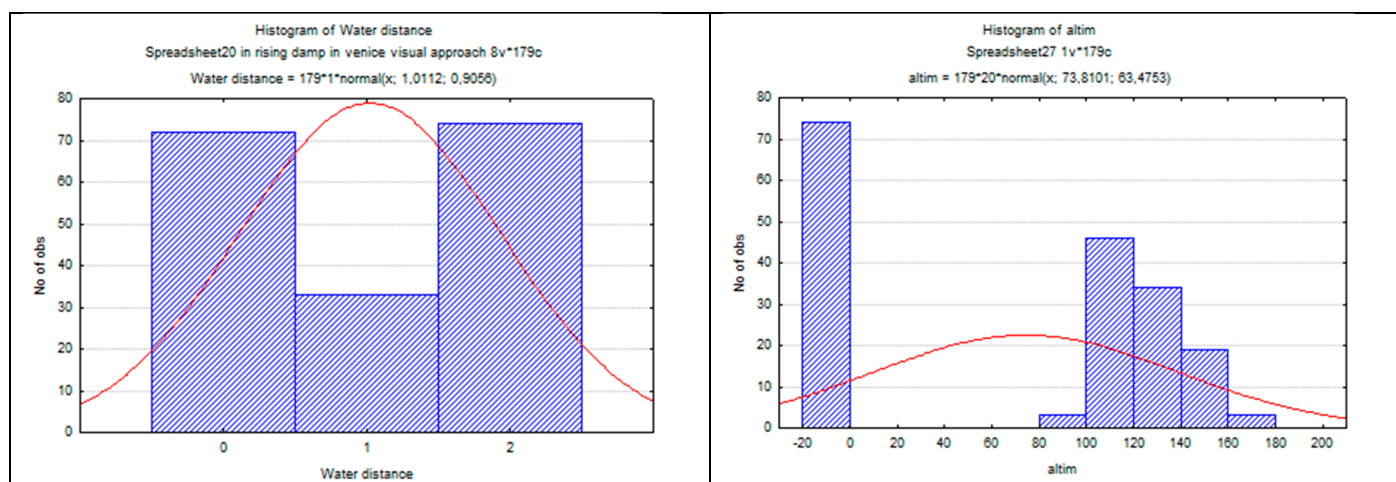

Figure S1 Histogram of frequency of masonries cases categorized according to their altimetry (0; 100–110; 110–120; 121–130; 131–140; >140 cm on ZMPS) and distance from water (0=directly in contact; 1= 1–5 m away; 2 = >5m from water)

Table S2 Number of observations visualized as histograms categorized by altimetry (0; 100–110; 110–120; 121–130; 131–140; >140 cm on ZMPS) and distance from water (0=directly in contact; 1= 1–5 m away; 2 = >5m from water)

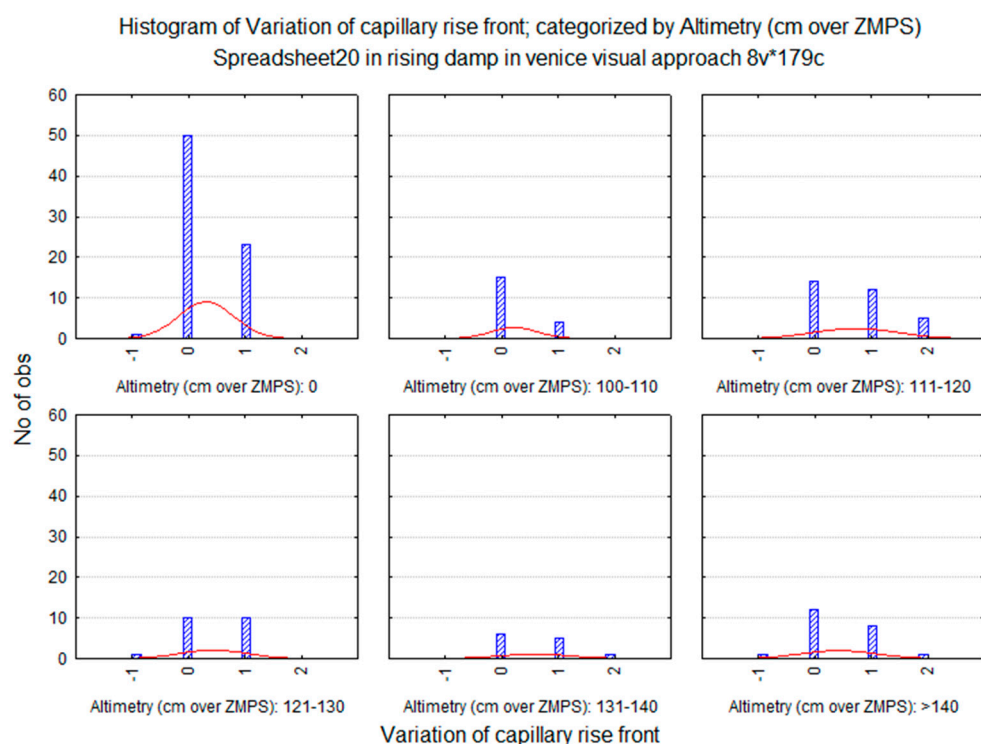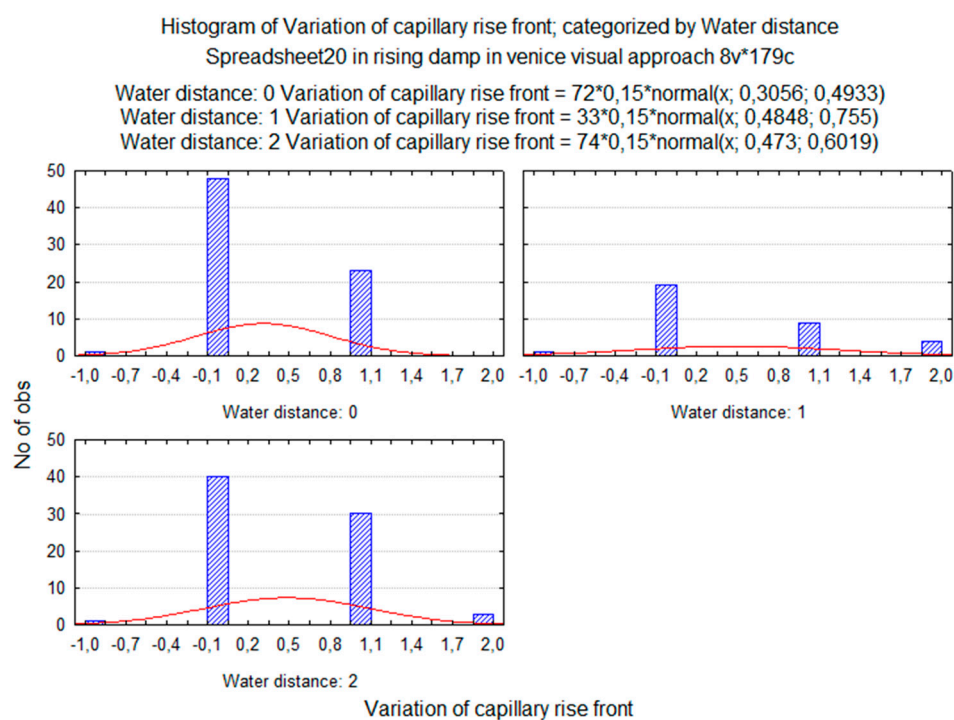

Histogram of Variation of erosion extension; categorized by Altimetry (cm over ZMPS)  
Spreadsheet20 in rising damp in venice visual approach 8v\*179c

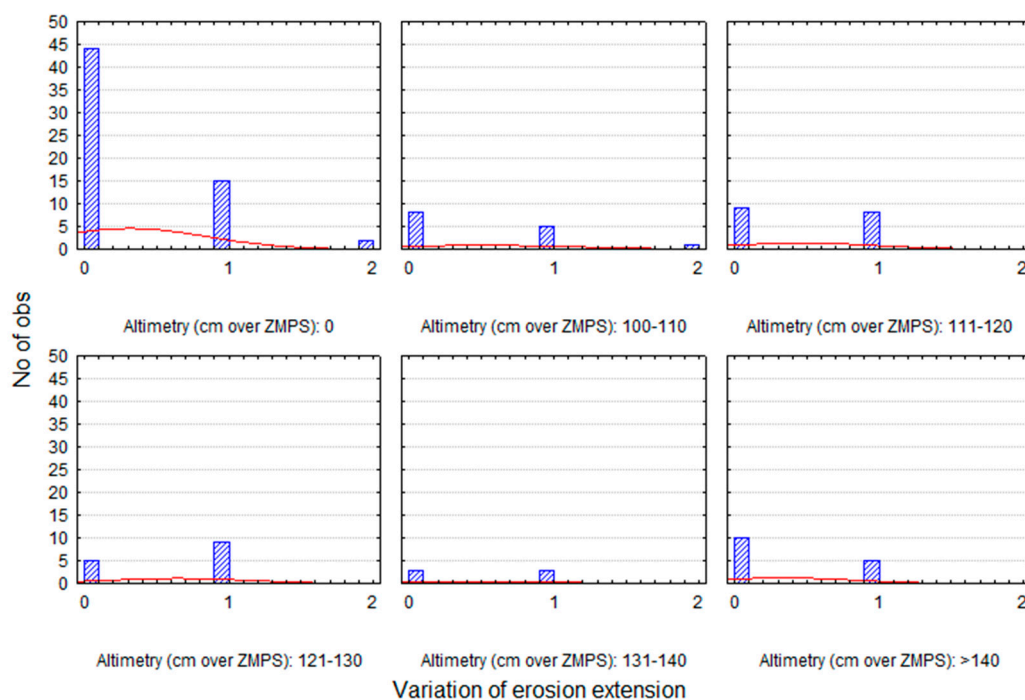

Histogram of Variation of erosion extension; categorized by Water distance  
Spreadsheet20 in rising damp in venice visual approach 8v\*179c

Water distance: 0 Variation of erosion extension =  $59 \cdot 0,1 \cdot \text{normal}(x; 0,2881; 0,4931)$   
 Water distance: 1 Variation of erosion extension =  $19 \cdot 0,1 \cdot \text{normal}(x; 0,4737; 0,6967)$   
 Water distance: 2 Variation of erosion extension =  $49 \cdot 0,1 \cdot \text{normal}(x; 0,5102; 0,5051)$

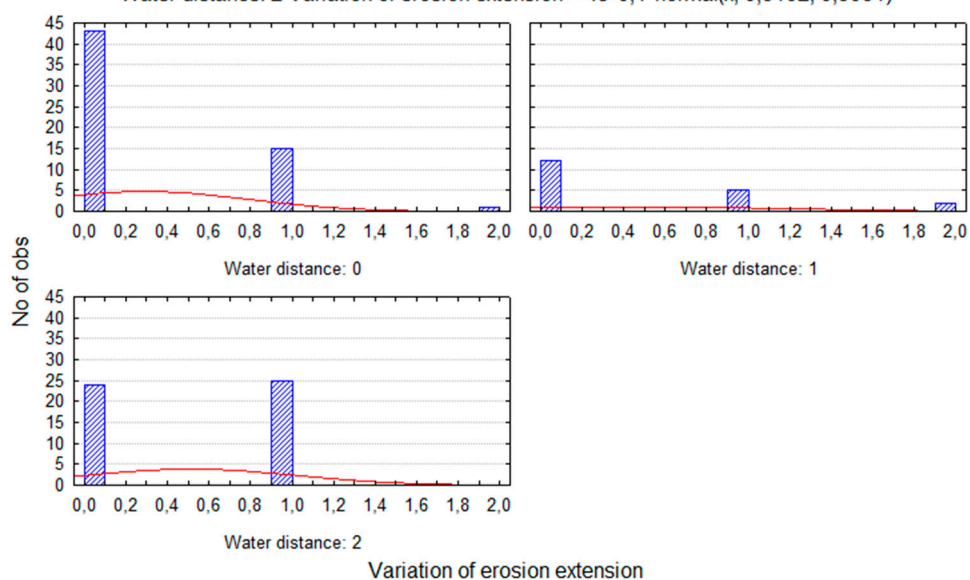

Table S3 ANOVA results on variation of capillary front (blu line) and erosion extension (red line) in reference to water distance and Altimetry

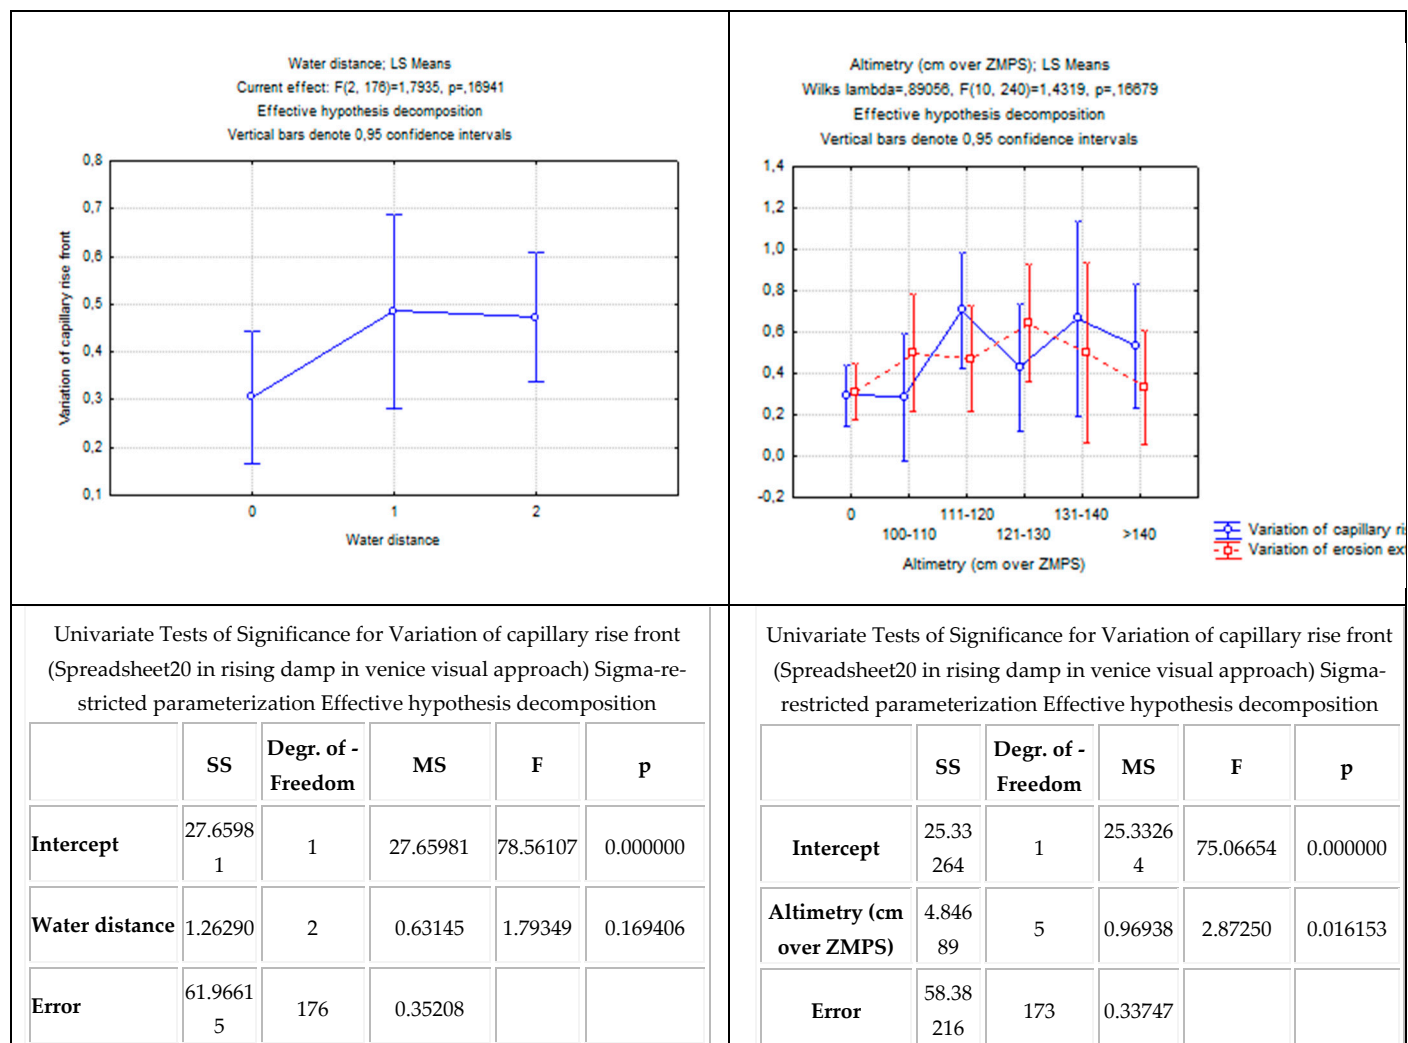

Table S4 Yearly cumulative precipitation and temperature 2000–2022 (left); monthly mean precipitation, relative humidity and average temperature during the 2000–2022 periods in Venice. Data freely available since 2000 on ARPAV Regional Agency of Veneto for the environmental protection and prevention and the Centro previsione e segnalazione maree, Municipality of Venice sites ([www.Arpa.veneto.it](http://www.Arpa.veneto.it) ; [www.comune.venezia.it](http://www.comune.venezia.it) )

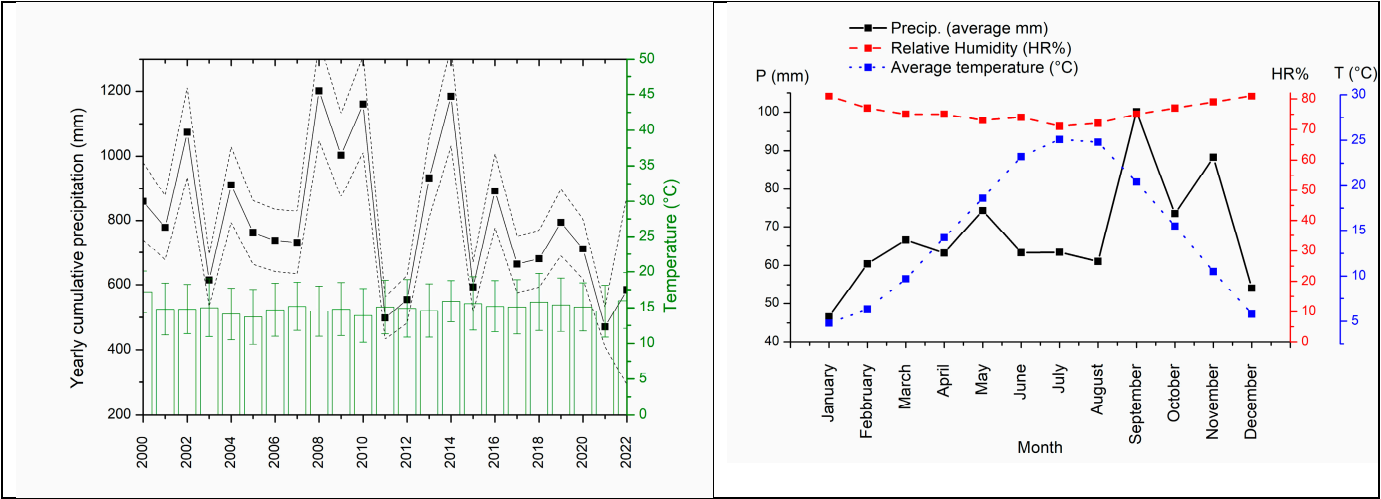

Supplement: s1 [file s1]
